# Supplementary material
Source: Springer Nature journal article supplement (https://www.springermedizin.de/resource/supplementary/12936_2011_1863_MOESM6_ESM.pdf/9541942)
Supplement: MOESM6 [file 9541942]

Parasitaemia (%)

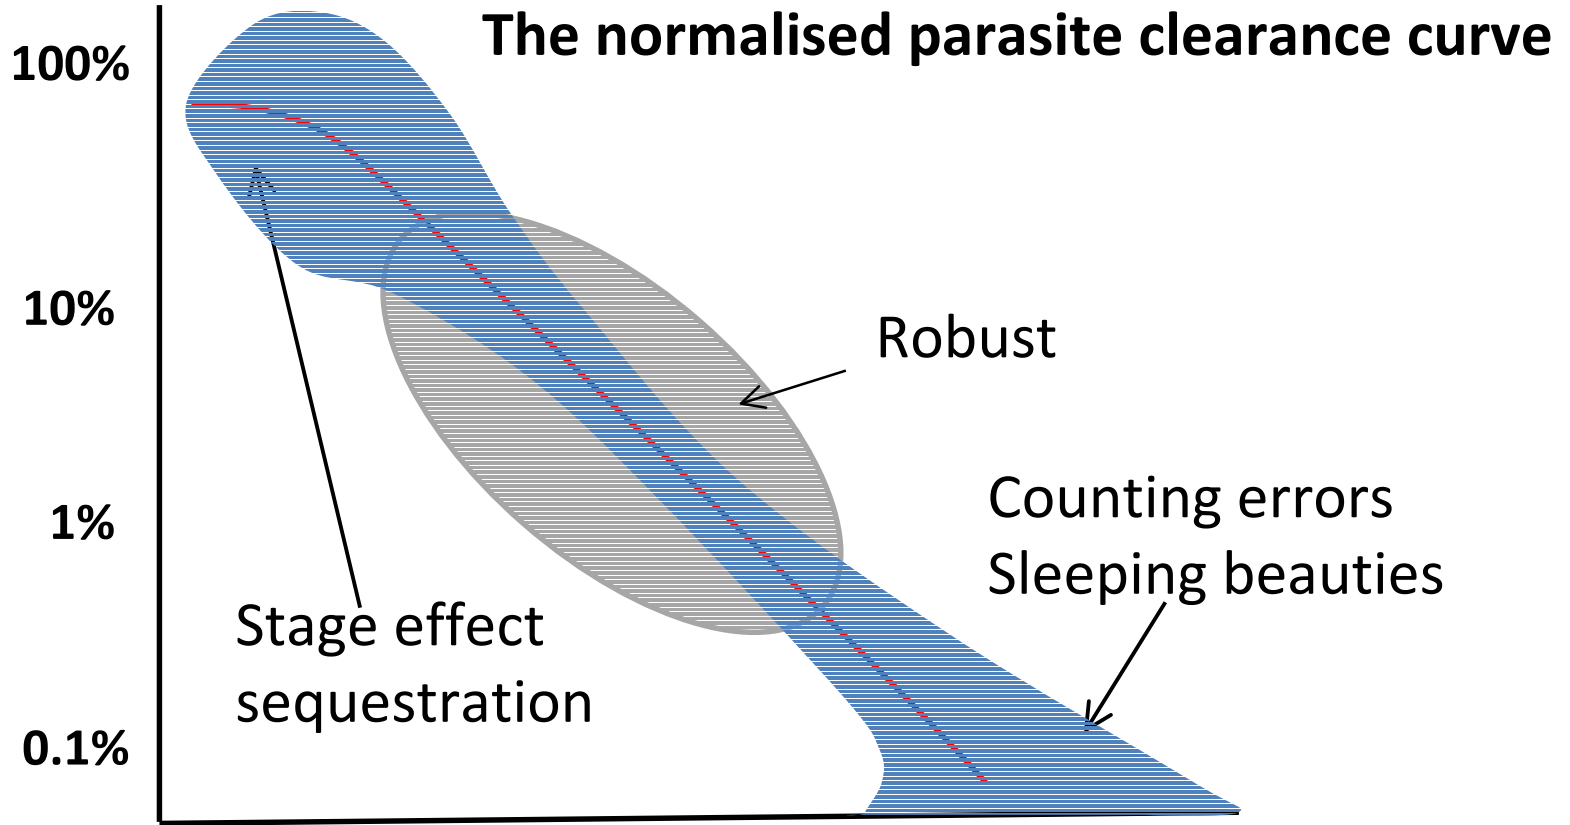

Input from schizont rupture

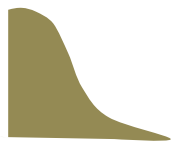

Sources of variance

Stage effect sequestration

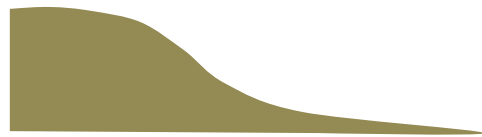

Time
